# Supplementary material for: Inhibition of ALDH2 by O-GlcNAcylation contributes to the hyperglycemic exacerbation of myocardial ischemia/reperfusion injury
Source: PubMed Central journal article supplement (PMC5386694; doi:10.18632/oncotarget.14297), 2016-12-27
Supplement: oncotarget-08-19413-s001.pdf [file oncotarget-08-19413-s001.pdf]

# Inhibition of ALDH2 by O-GlcNAcylation contributes to the hyperglycemic exacerbation of myocardial ischemia/reperfusion injury

## SUPPLEMENTARY FIGURES

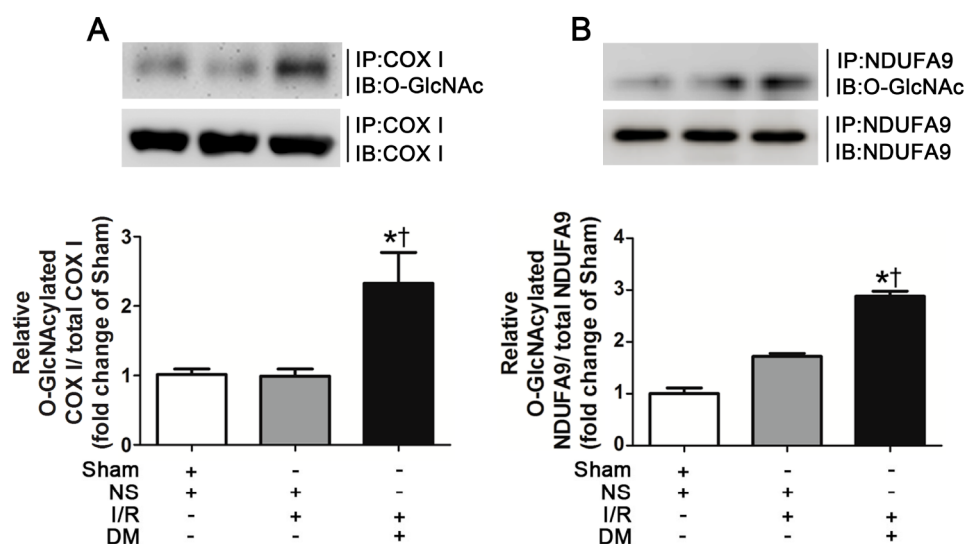

**Supplementary Figure 1: Hyperglycemia increased O-GlcNAc modification of myocardial COX I and NDUFA9 after myocardial ischemia/reperfusion in rats.** **A.** COX I O-GlcNAcylation in myocardial tissue. Tissue lysates were immunoprecipitated with specific anti-COX I antibody and then subjected to western blot using anti-O-GlcNAc (CDT110.6) antibody. **B.** NDUFA9 O-GlcNAcylation in myocardial tissue. In each graph, the mean value of Sham was expressed as 1. IP, immunoprecipitation; IB, immunoblotting; Sham, sham-operated; NS, normal saline; I/R, myocardial ischemia/reperfusion; DM, diabetes. Data are means ± SEM of 4 to 5 samples in each group. \* $P < 0.05$  vs Sham group; † $P < 0.05$  vs NS+I/R group.

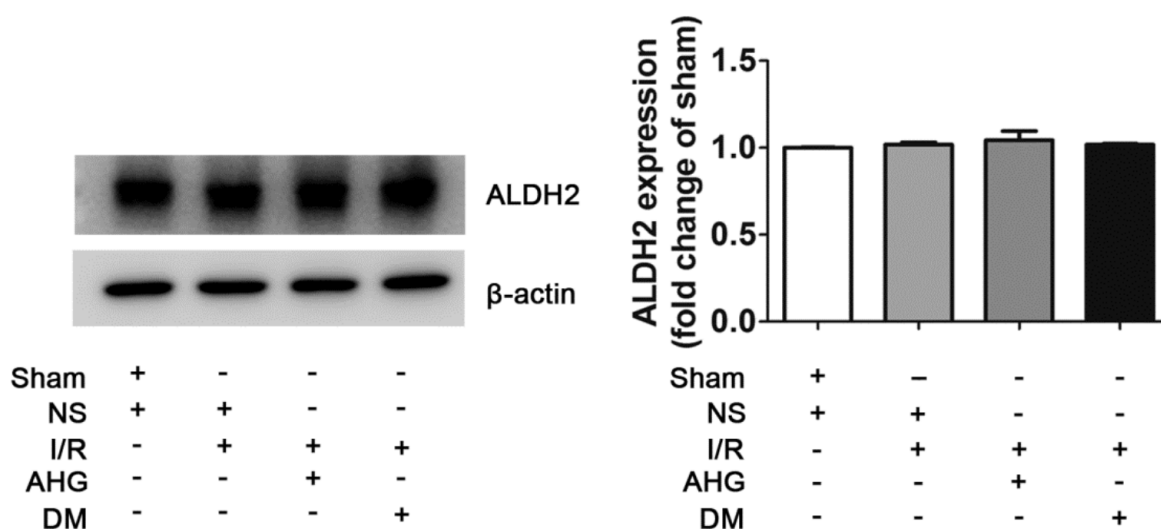

**Supplementary Figure 2: ALDH2 expression in heart tissue.** Tissue lysates were separated by SDS-PAGE, and western blot was performed using specific anti-ALDH2 antibody. In each graph, the mean value of Sham was expressed as 1. Sham, sham-operated; NS, normal saline; I/R, myocardial ischemia/reperfusion; AHG, acute hyperglycemia; DM, diabetes. Data are means ± SEM of 4 to 5 samples in each group. \* $P < 0.05$  vs Sham group; † $P < 0.05$  vs NS+I/R group.

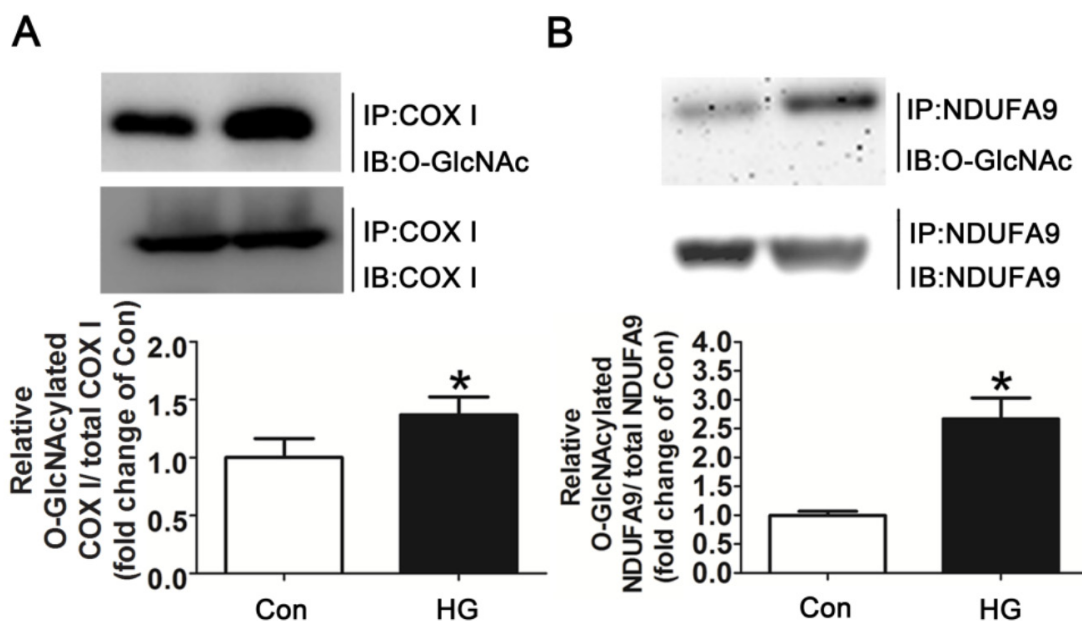

**Supplementary Figure 3: Hyperglycemia increased O-GlcNAc modification of COX I and NDUFA9 *in vitro*.** **A.** COX I O-GlcNAcylation. H9c2 cells lysates were immunoprecipitated with specific anti-COX I antibody and then subjected to western blot using anti-O-GlcNAc (CDT110.6) antibody. **B.** NDUFA9 O-GlcNAcylation. Mannitol was used to keep the osmolarity consistent among different glucose concentrations *in vitro*. In each graph, the mean value of Con was expressed as 1. IP, immunoprecipitation; IB, immunoblotting; Con: normal glucose; HG: high glucose. Data are means ± SEM of 4 to 5 samples in each group. \* $P < 0.05$  vs Con group.
